# Supplementary material for: High-performance supercapacitors of Cu-based porous coordination polymer nanowires and the derived porous CuO nanotubes
Source: Royal Society of Chemistry journal article supplement (doi:10.1039/c7dt03260a), 2017-01-01
Supplement: c7dt03260a1.pdf [file c7dt03260a1.pdf]

## Electronic Supplementary Information

### High-performance supercapacitors of Cu-based porous coordination polymer nanowire and its derived porous CuO nanotube

Meng-Ke Wu, Jiao-Jiao Zhou, Fei-Yan Yi, Chen Chen, Yan-Li Li, Qin Li, Kai Tao, and Lei Han\*

State Key Laboratory Base of Novel Functional Materials and Preparation Science, School of Materials Science & Chemical Engineering, Ningbo University, Ningbo, Zhejiang 315211, China.

\*E-mail: hanlei@nbu.edu.cn

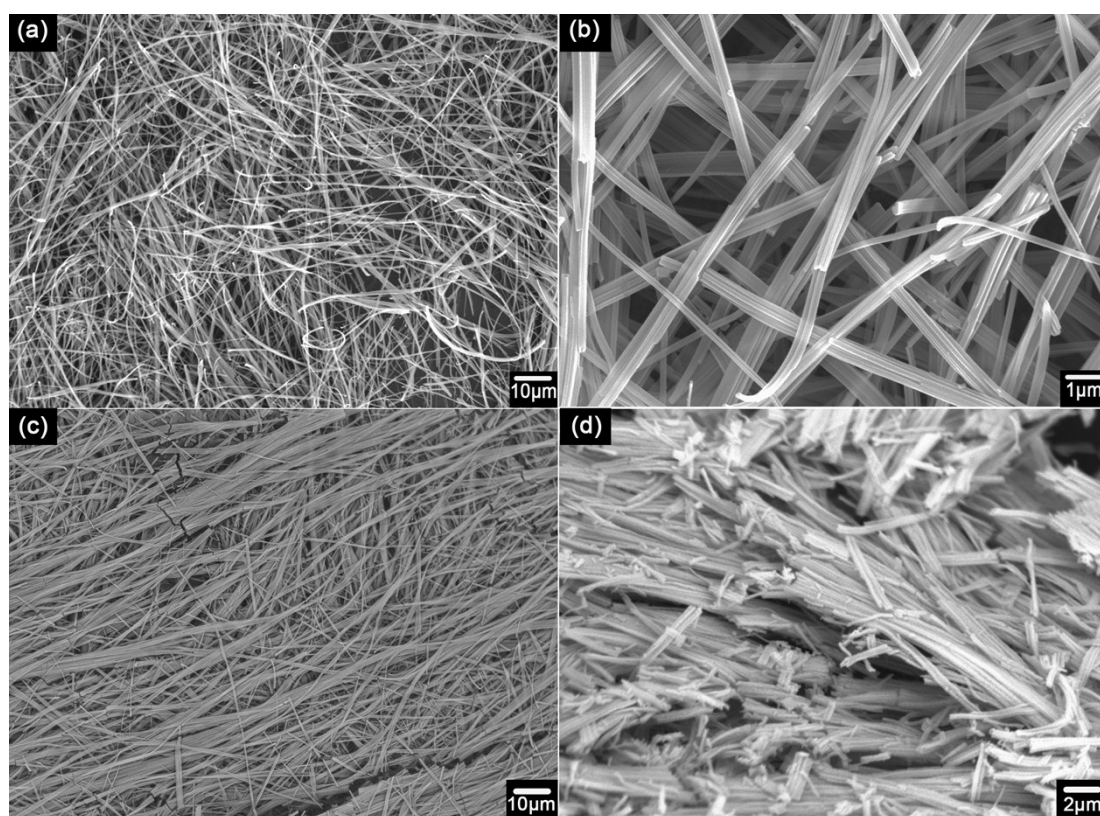

**Fig. S1.** SEM images of Cu-Asp nanowires prepared by increasing reactant concentration (a-c) and calcinated at 300 °C (d).

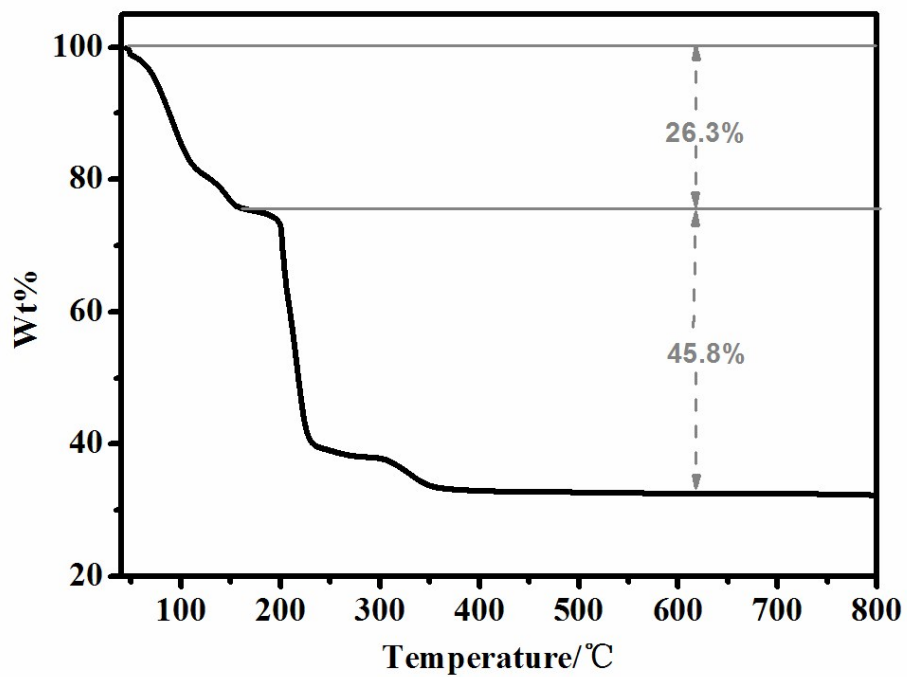

**Fig. S2.** Thermogravimetric analysis (TGA) of the ultralong Cu-Asp nanowires under air flow with a heating rate of  $10\text{ }^{\circ}\text{C min}^{-1}$ .

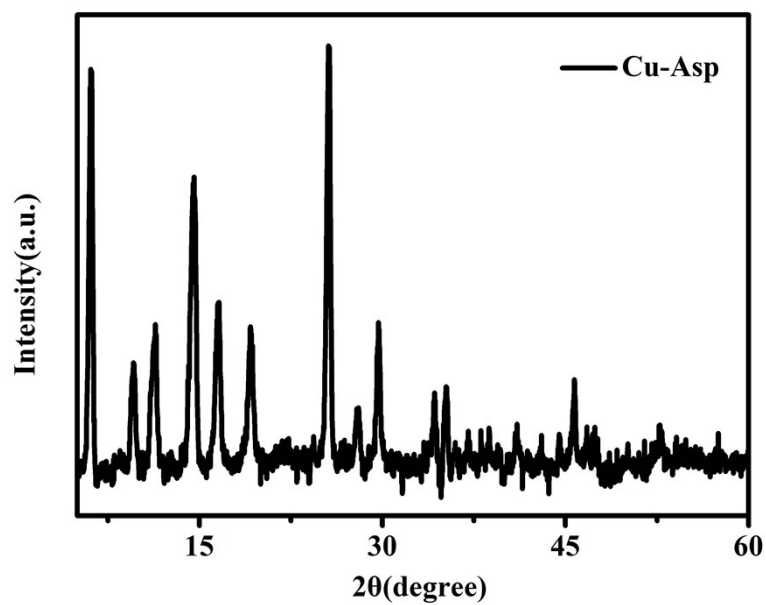

**Fig. S3.** XRD pattern of as-synthesized Cu-Asp nanowires.

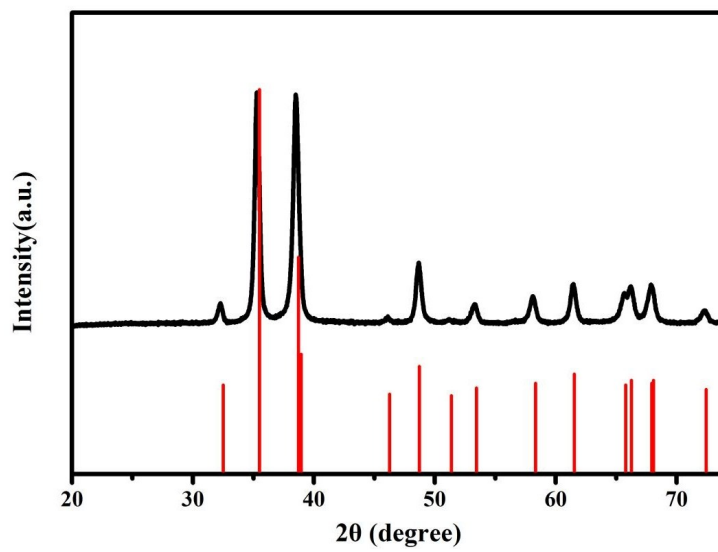

Fig. S4. XRD pattern of as-synthesized porous CuO nanotube.
